# Supplementary material for: Quantum chemical characterization of the generation of high-valent oxoruthenium species of Keggin type polyoxometalates: electronic structure and bonding features
Source: Royal Society of Chemistry journal article supplement (doi:10.1039/c0dt01085e), 2011-01-01
Supplement: c0dt01085e.pdf [file c0dt01085e.pdf]

## Supporting Information

### Quantum Chemical Characterization of the Generation of High-Valent Oxoruthenium Species of Keggin Typical Polyoxometalate: Electronic Structure and Bonding Feature

Chun-Guang Liu, Wei Guan, Li-Kai Yan, and Zhong-Min Su\*

*Institute of Functional Material Chemistry, Faculty of Chemistry, Northeast Normal  
University, Changchun 130024;*

---

\* Corresponding author.

E-mail addresses: [zmsu@nenu.edu.cn](mailto:zmsu@nenu.edu.cn);

The POM complex **21** has been characterized as energy minima at the B3LYP/6-31g(d) level (LANL2DZ basis sets on the metal atom) using the GAUSSIAN 03 because of its robust and fast frequency calculation routine.

Diagonal vibrational polarizability:

251.3415578      254.4072359      275.3065415

Harmonic frequencies (cm<sup>-1</sup>), IR intensities (KM/Mole), Raman scatteringactivities (A<sup>4</sup>/AMU), depolarization ratios for plane and unpolarized incident light, reduced masses (AMU), force constants (mDyne/A), and normal coordinates:

|                |    | 1       |       |       | 2       |       |       | 3       |       |       |
|----------------|----|---------|-------|-------|---------|-------|-------|---------|-------|-------|
|                |    | A       |       |       | A       |       |       | A       |       |       |
| Frequencies -- |    | 30.1380 |       |       | 65.4955 |       |       | 67.2312 |       |       |
| Red. masses -- |    | 66.7285 |       |       | 60.1798 |       |       | 72.0437 |       |       |
| Frc consts --  |    | 0.0357  |       |       | 0.1521  |       |       | 0.1919  |       |       |
| IR Inten --    |    | 0.0477  |       |       | 0.0011  |       |       | 0.0055  |       |       |
| Atom           | AN | X       | Y     | Z     | X       | Y     | Z     | X       | Y     | Z     |
| 1              | 8  | -0.01   | -0.02 | -0.01 | 0.01    | 0.02  | -0.04 | 0.00    | 0.00  | 0.03  |
| 2              | 15 | 0.00    | -0.01 | 0.00  | 0.00    | 0.01  | 0.00  | -0.01   | 0.00  | -0.02 |
| 3              | 8  | 0.00    | 0.01  | 0.00  | 0.00    | 0.05  | 0.00  | 0.06    | 0.00  | -0.07 |
| 4              | 8  | 0.00    | 0.00  | 0.00  | 0.00    | -0.06 | 0.00  | -0.08   | 0.00  | -0.07 |
| 5              | 44 | 0.00    | -0.12 | 0.00  | 0.00    | -0.06 | 0.00  | -0.02   | 0.00  | -0.12 |
| 6              | 8  | 0.05    | -0.06 | 0.06  | 0.05    | -0.01 | -0.06 | -0.07   | -0.04 | -0.09 |
| 7              | 74 | 0.11    | 0.07  | 0.07  | -0.02   | -0.16 | -0.06 | -0.15   | -0.04 | -0.03 |
| 8              | 8  | 0.06    | -0.02 | 0.03  | 0.12    | -0.05 | -0.03 | -0.05   | 0.03  | 0.07  |
| 9              | 74 | -0.03   | -0.04 | -0.15 | -0.04   | 0.01  | 0.01  | 0.03    | 0.00  | 0.23  |
| 10             | 8  | -0.01   | -0.02 | 0.03  | 0.06    | 0.17  | -0.07 | 0.07    | -0.05 | 0.06  |
| 11             | 74 | -0.13   | -0.09 | 0.07  | 0.06    | 0.14  | -0.13 | 0.13    | 0.03  | -0.02 |
| 12             | 8  | 0.00    | 0.04  | 0.06  | 0.12    | 0.09  | -0.08 | -0.01   | 0.00  | 0.01  |
| 13             | 8  | 0.01    | -0.02 | 0.01  | -0.01   | 0.02  | 0.04  | 0.00    | 0.00  | 0.03  |
| 14             | 8  | 0.00    | 0.01  | 0.00  | 0.00    | 0.17  | 0.00  | 0.14    | 0.00  | 0.01  |
| 15             | 74 | 0.13    | -0.09 | -0.07 | -0.07   | 0.14  | 0.13  | 0.14    | -0.02 | -0.02 |
| 16             | 8  | 0.01    | 0.10  | -0.03 | -0.05   | 0.10  | 0.02  | 0.03    | -0.01 | -0.10 |
| 17             | 74 | 0.00    | 0.19  | 0.00  | 0.00    | -0.07 | 0.00  | -0.04   | 0.01  | -0.17 |
| 18             | 8  | -0.01   | 0.10  | 0.03  | 0.05    | 0.10  | -0.02 | 0.03    | 0.01  | -0.11 |
| 19             | 8  | 0.00    | 0.04  | -0.06 | -0.12   | 0.09  | 0.07  | -0.01   | 0.01  | 0.01  |
| 20             | 74 | -0.10   | 0.07  | -0.07 | 0.03    | -0.16 | 0.06  | -0.14   | 0.03  | -0.03 |
| 21             | 8  | -0.05   | -0.06 | -0.06 | -0.04   | -0.01 | 0.06  | -0.07   | 0.05  | -0.09 |
| 22             | 8  | -0.13   | 0.09  | -0.10 | 0.01    | -0.12 | 0.08  | -0.13   | 0.02  | -0.01 |
| 23             | 8  | -0.06   | -0.02 | -0.03 | -0.11   | -0.05 | 0.02  | -0.05   | -0.03 | 0.08  |
| 24             | 74 | 0.03    | -0.04 | 0.14  | 0.03    | 0.01  | -0.01 | 0.04    | -0.01 | 0.23  |
| 25             | 8  | 0.01    | -0.03 | -0.04 | -0.11   | 0.04  | -0.08 | 0.04    | -0.02 | 0.07  |
| 26             | 74 | 0.08    | 0.11  | -0.08 | 0.04    | 0.19  | -0.05 | 0.16    | 0.04  | -0.04 |
| 27             | 8  | 0.00    | 0.01  | 0.00  | 0.00    | -0.02 | 0.00  | 0.24    | 0.00  | 0.03  |
| 28             | 74 | -0.08   | 0.11  | 0.08  | -0.04   | 0.19  | 0.05  | 0.16    | -0.03 | -0.04 |

|    |    |       |       |       |       |       |       |       |       |       |
|----|----|-------|-------|-------|-------|-------|-------|-------|-------|-------|
| 29 | 8  | -0.01 | -0.03 | 0.04  | 0.11  | 0.05  | 0.08  | 0.05  | 0.02  | 0.07  |
| 30 | 8  | 0.00  | 0.06  | 0.00  | 0.00  | -0.05 | 0.00  | -0.16 | 0.00  | 0.01  |
| 31 | 8  | 0.12  | -0.07 | -0.09 | -0.08 | 0.17  | 0.10  | 0.14  | -0.02 | -0.03 |
| 32 | 8  | 0.01  | -0.02 | -0.03 | -0.06 | 0.17  | 0.06  | 0.06  | 0.05  | 0.07  |
| 33 | 8  | 0.01  | -0.04 | 0.13  | -0.03 | 0.02  | -0.05 | 0.03  | -0.01 | 0.21  |
| 34 | 8  | -0.07 | -0.05 | -0.04 | -0.11 | -0.06 | -0.11 | -0.05 | 0.00  | 0.07  |
| 35 | 74 | -0.13 | -0.10 | -0.08 | -0.01 | -0.12 | -0.07 | -0.16 | -0.01 | -0.02 |
| 36 | 8  | -0.05 | -0.03 | -0.08 | -0.05 | -0.13 | -0.09 | -0.03 | -0.01 | 0.01  |
| 37 | 8  | -0.15 | -0.10 | -0.09 | -0.03 | -0.14 | -0.08 | -0.14 | 0.00  | 0.00  |
| 38 | 8  | -0.04 | 0.06  | -0.02 | 0.00  | -0.05 | -0.08 | -0.04 | -0.01 | -0.11 |
| 39 | 8  | 0.00  | -0.04 | 0.00  | 0.00  | -0.13 | 0.00  | -0.16 | 0.00  | 0.08  |
| 40 | 74 | 0.13  | -0.10 | 0.08  | 0.01  | -0.12 | 0.07  | -0.15 | 0.01  | -0.01 |
| 41 | 8  | 0.05  | -0.03 | 0.08  | 0.05  | -0.13 | 0.09  | -0.02 | 0.00  | 0.01  |
| 42 | 8  | 0.09  | 0.09  | -0.10 | 0.02  | 0.11  | -0.08 | 0.12  | 0.01  | -0.01 |
| 43 | 8  | -0.01 | -0.10 | -0.07 | -0.04 | -0.10 | -0.01 | 0.05  | 0.05  | -0.12 |
| 44 | 8  | 0.00  | 0.21  | 0.00  | 0.00  | -0.03 | 0.00  | -0.03 | 0.00  | -0.17 |
| 45 | 8  | 0.04  | 0.06  | 0.03  | 0.00  | -0.05 | 0.08  | -0.03 | 0.00  | -0.11 |
| 46 | 8  | -0.12 | -0.06 | 0.08  | 0.08  | 0.17  | -0.10 | 0.14  | 0.03  | -0.03 |
| 47 | 8  | 0.14  | 0.09  | 0.09  | 0.00  | -0.12 | -0.08 | -0.13 | -0.02 | -0.01 |
| 48 | 8  | 0.01  | -0.10 | 0.07  | 0.04  | -0.09 | 0.01  | 0.05  | -0.04 | -0.12 |
| 49 | 8  | 0.15  | -0.10 | 0.09  | 0.03  | -0.14 | 0.08  | -0.12 | -0.01 | 0.00  |
| 50 | 8  | 0.07  | -0.04 | 0.04  | 0.11  | -0.06 | 0.11  | -0.05 | -0.02 | 0.06  |
| 51 | 8  | -0.01 | -0.04 | -0.13 | 0.03  | 0.02  | 0.05  | 0.03  | 0.00  | 0.21  |
| 52 | 8  | -0.09 | 0.09  | 0.10  | -0.02 | 0.12  | 0.09  | 0.13  | -0.01 | -0.01 |
| 53 | 8  | 0.00  | -0.26 | 0.00  | 0.00  | -0.11 | 0.00  | -0.01 | 0.01  | -0.12 |
| 54 | 1  | 0.02  | -0.25 | 0.05  | 0.03  | -0.13 | 0.01  | -0.01 | 0.00  | -0.13 |
| 55 | 1  | -0.02 | -0.25 | -0.05 | -0.03 | -0.13 | -0.01 | -0.01 | 0.01  | -0.13 |

.....

Table S1. The Calculated Total Bonding Energies and Expectation Values of All Mono-Ruthenium Substituted Keggin-Type POMs in Different Spin States

| Complex                                             | d-electron     | Energy (Kcal mol <sup>-1</sup> ) | Exact value | Expectation value |
|-----------------------------------------------------|----------------|----------------------------------|-------------|-------------------|
| <sup>1</sup> 1 <sup>1e</sup> <sub>reduced</sub>     | d <sup>6</sup> | -10196.34                        | -           | -                 |
| <sup>2</sup> 1                                      | d <sup>5</sup> | -10346.25                        | 0.75000     | 0.75540           |
| <sup>2</sup> 1(Si)                                  | d <sup>5</sup> | -10238.53                        | 0.75000     | 0.75321           |
| <sup>1</sup> 1 <sup>1e</sup> <sub>oxidized</sub>    | d <sup>4</sup> | -10403.22                        | -           | -                 |
| <sup>3</sup> 1 <sup>1e</sup> <sub>oxidized</sub>    |                | -10413.84                        | 2.00000     | 2.00706           |
| <sup>5</sup> 1 <sup>1e</sup> <sub>oxidized</sub>    |                | -10402.07                        | 6.00000     | 6.01085           |
| <sup>1</sup> 1 <sup>1e1H+</sup> <sub>oxidized</sub> | d <sup>4</sup> | -10246.03                        | -           | -                 |
| <sup>3</sup> 1 <sup>1e1H+</sup> <sub>oxidized</sub> |                | -10260.32                        | 2.00000     | 2.00647           |
| <sup>5</sup> 1 <sup>1e1H+</sup> <sub>oxidized</sub> |                | -10232.42                        | 6.00000     | 6.01180           |
| <sup>1</sup> 1 <sup>1e2H+</sup> <sub>oxidized</sub> | d <sup>4</sup> | -10002.95                        | -           | -                 |
| <sup>3</sup> 1 <sup>1e2H+</sup> <sub>oxidized</sub> |                | -10027.05                        | 2.00000     | 2.01138           |
| <sup>5</sup> 1 <sup>1e2H+</sup> <sub>oxidized</sub> |                | -10003.65                        | 6.00000     | 6.01090           |
| <sup>2</sup> 1 <sup>2e2H+</sup> <sub>oxidized</sub> | d <sup>3</sup> | -10157.50                        | 0.75000     | 0.76937           |
| <sup>4</sup> 1 <sup>2e2H+</sup> <sub>oxidized</sub> |                | -10159.60                        | 3.75000     | 3.75943           |
| <sup>1</sup> 1 <sup>3e2H+</sup> <sub>oxidized</sub> | d <sup>2</sup> | -10214.91                        | -           | -                 |
| <sup>3</sup> 1 <sup>3e2H+</sup> <sub>oxidized</sub> |                | -10218.30                        | 2.00000     | 2.00796           |
| <sup>5</sup> 1 <sup>3e2H+</sup> <sub>oxidized</sub> |                | -10190.38                        | 6.00000     | 6.01607           |

Table S2. Energy decomposition analysis (EDA) of ruthenium(III) complex <sup>2</sup>1 at BP86/TZP calculations (Energy contributions for Ru<sup>III</sup>-OH<sub>2</sub> bond in kcal mol<sup>-1</sup>).

| System         | $\Delta E_{\text{int}}$ | $\Delta E_{\text{Pauli}}$ | $\Delta E_{\text{elstat}}$ | $\Delta E_{\text{orb}}$ | $\Delta E_{\text{prep}}$ | $\Delta E_{\text{prep}}(\text{Ru}^{\text{III}})$ | $\Delta E_{\text{prep}}(\text{H}_2\text{O})$ | $\Delta E(=-D_e)$ |
|----------------|-------------------------|---------------------------|----------------------------|-------------------------|--------------------------|--------------------------------------------------|----------------------------------------------|-------------------|
| <sup>2</sup> 1 | -25.94                  | 79.77                     | -68.62                     | -37.09                  | 6.55                     | 5.80                                             | 0.75                                         | -19.39            |

As shown in Table S2, the EDAs show that Ru-OH<sub>2</sub> bond has the low orbital interaction energy,  $\Delta E_{\text{orb}}$ , and high electrostatic interaction energy,  $\Delta E_{\text{elstat}}$ , and thus it displays high ionic character. Because the bonding contribution of electrostatic attractions  $\Delta E_{\text{elstat}}$  to Ru-OH<sub>2</sub> bond has been largely cancelled by the repulsive term  $\Delta E_{\text{Pauli}}$ , the interaction energy between the H<sub>2</sub>O molecule and POM fragment are relative small, -19.4 kcal mol<sup>-1</sup>.

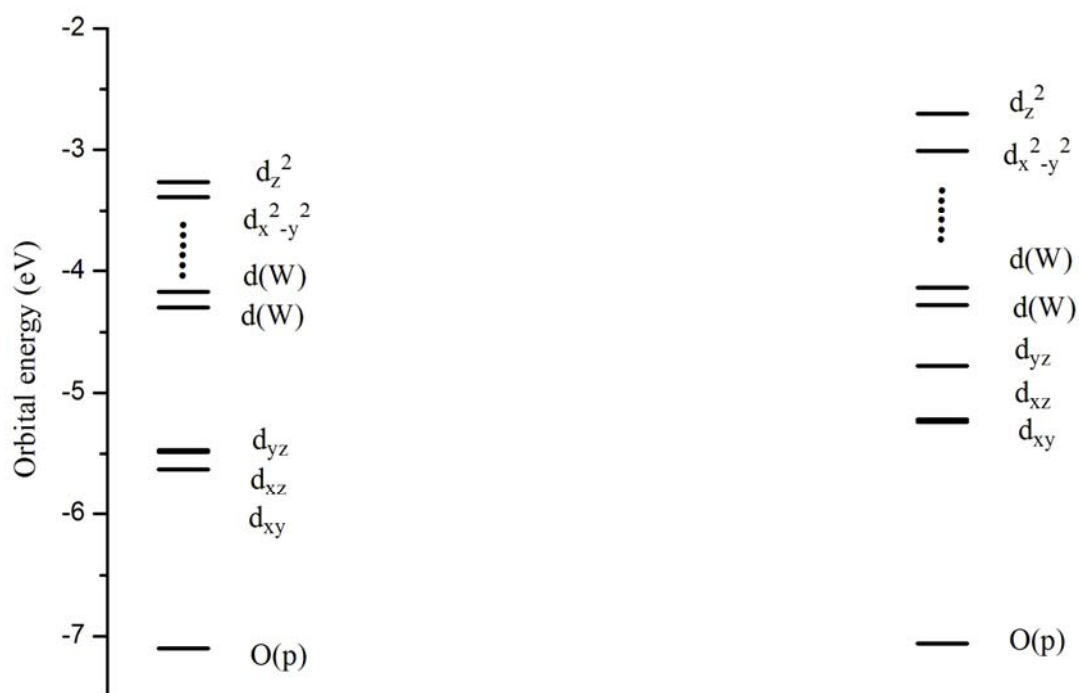

Fig S1. The metal-based d orbital energy level diagram for aquaruthenium(III) POM complexes in ground state obtained by the BP86/TZP calculations in acetonitrile (the dense d-W orbitals of POM ligand are not listed overall here)

The optimized geometry of  $1^1e_{\text{reduced}}$  in ground state

|    |           |           |           |
|----|-----------|-----------|-----------|
| O  | -0.013638 | -0.015394 | -0.015397 |
| P  | -0.010526 | -0.016816 | 1.538962  |
| O  | 1.448881  | -0.021203 | 2.076843  |
| O  | -0.715032 | -1.333611 | 2.049610  |
| Ru | -2.742652 | -1.721984 | 1.688406  |
| O  | -2.766174 | -2.163762 | 3.713259  |
| W  | -1.096618 | -1.950720 | 4.503572  |
| O  | -1.468974 | -0.016185 | 4.669689  |
| W  | -1.111691 | 1.845474  | 4.416526  |
| O  | 0.769581  | 1.339689  | 4.638038  |
| W  | 2.147067  | 0.015861  | 4.453049  |
| O  | 0.789244  | -1.282236 | 4.675203  |
| O  | -0.775710 | 1.228034  | 2.067803  |
| O  | 3.236012  | -1.302292 | 3.506099  |
| W  | 3.158996  | -1.746052 | 1.609539  |
| O  | 3.981386  | 0.017514  | 1.322056  |
| W  | 3.167270  | 1.751701  | 1.589661  |
| O  | 3.210033  | 1.353982  | 3.487102  |
| O  | 1.759914  | -2.967246 | 1.959245  |
| W  | -0.081686 | -3.693639 | 1.613469  |
| O  | -1.892791 | -3.562717 | 1.382131  |
| O  | 0.209171  | -5.410553 | 1.462406  |
| O  | 0.267512  | -3.013360 | -0.186668 |
| W  | 0.986729  | -1.745334 | -1.442458 |
| O  | -0.749996 | -1.318692 | -2.143146 |
| W  | -2.082901 | -0.031179 | -1.450868 |
| O  | -2.651845 | 1.441504  | -0.257205 |
| W  | -3.165594 | 1.876686  | 1.550981  |
| O  | -2.754188 | 2.159031  | 3.476619  |
| O  | -0.324797 | -3.455330 | 3.577445  |
| O  | 4.551974  | -2.783557 | 1.442662  |
| O  | 2.488667  | -1.637393 | -0.191705 |
| O  | 1.613768  | -2.792160 | -2.686355 |
| O  | 1.575849  | 0.003367  | -2.111272 |
| W  | 0.978647  | 1.733057  | -1.477325 |
| O  | -0.746709 | 1.354044  | -2.136281 |
| O  | 1.616166  | 2.794378  | -2.706538 |
| O  | 2.466367  | 1.661976  | -0.193086 |
| O  | 0.226822  | 2.983210  | -0.195582 |
| W  | -0.091820 | 3.628521  | 1.603528  |
| O  | -1.959964 | 3.482673  | 1.319773  |

|   |           |           |           |
|---|-----------|-----------|-----------|
| O | -3.262855 | -0.006738 | -2.747174 |
| O | -2.749619 | -1.233557 | -0.275828 |
| O | 4.537339  | 2.817938  | 1.419401  |
| O | 1.717322  | 2.969681  | 1.936769  |
| O | 2.922924  | 0.042573  | 6.015814  |
| O | -1.383210 | -2.563603 | 6.110550  |
| O | -3.610153 | 0.126627  | 1.922991  |
| O | 0.167434  | 5.346326  | 1.449602  |
| O | -0.417590 | 3.439733  | 3.496710  |
| O | -1.490452 | 2.509051  | 5.983390  |
| O | -4.727861 | 2.646538  | 1.399315  |
| O | -5.004632 | -2.053226 | 2.137487  |
| H | -4.558578 | -2.235809 | 3.008661  |
| H | -4.925426 | -1.052998 | 2.092126  |

The optimized geometry of  ${}^2\mathbf{1}$  in ground state

|    |           |           |           |
|----|-----------|-----------|-----------|
| O  | -0.052878 | -0.046231 | 0.012459  |
| P  | -0.019345 | -0.018716 | 1.563334  |
| O  | 1.445645  | -0.017457 | 2.076534  |
| O  | -0.717547 | -1.323579 | 2.124723  |
| Ru | -2.720903 | -1.715220 | 1.660170  |
| O  | -2.696232 | -2.133096 | 3.640234  |
| W  | -1.067775 | -1.928567 | 4.515156  |
| O  | -1.463981 | -0.005909 | 4.705305  |
| W  | -1.093797 | 1.847729  | 4.435675  |
| O  | 0.772937  | 1.337306  | 4.634272  |
| W  | 2.164395  | 0.016107  | 4.443204  |
| O  | 0.795789  | -1.284506 | 4.678926  |
| O  | -0.778281 | 1.231844  | 2.080350  |
| O  | 3.236040  | -1.300170 | 3.492859  |
| W  | 3.161571  | -1.733880 | 1.594427  |
| O  | 3.974563  | 0.022644  | 1.306971  |
| W  | 3.163515  | 1.752950  | 1.590521  |
| O  | 3.214135  | 1.359979  | 3.479314  |
| O  | 1.752497  | -2.965060 | 1.950852  |
| W  | -0.065495 | -3.686450 | 1.666894  |
| O  | -1.894726 | -3.536411 | 1.360507  |
| O  | 0.211457  | -5.393794 | 1.502065  |
| O  | 0.243058  | -3.007809 | -0.161398 |
| W  | 0.953715  | -1.764531 | -1.421482 |
| O  | -0.793522 | -1.331433 | -2.121370 |
| W  | -2.083493 | 0.003204  | -1.468500 |
| O  | -2.712435 | 1.368471  | -0.234558 |

|   |           |           |           |
|---|-----------|-----------|-----------|
| W | -3.156302 | 1.883728  | 1.588627  |
| O | -2.762023 | 2.130588  | 3.497054  |
| O | -0.341525 | -3.480421 | 3.584844  |
| O | 4.541875  | -2.770477 | 1.419233  |
| O | 2.465394  | -1.639961 | -0.197390 |
| O | 1.565918  | -2.810740 | -2.661968 |
| O | 1.521398  | -0.014000 | -2.107606 |
| W | 0.982129  | 1.718794  | -1.464030 |
| O | -0.780645 | 1.331592  | -2.119280 |
| O | 1.595363  | 2.772137  | -2.698097 |
| O | 2.452423  | 1.657363  | -0.202044 |
| O | 0.194062  | 2.953630  | -0.195628 |
| W | -0.098676 | 3.610892  | 1.601093  |
| O | -1.988158 | 3.451897  | 1.317700  |
| O | -3.253676 | 0.034941  | -2.755059 |
| O | -2.797471 | -1.284865 | -0.313845 |
| O | 4.519642  | 2.819133  | 1.408914  |
| O | 1.705403  | 2.968297  | 1.924681  |
| O | 2.938941  | 0.043649  | 5.995588  |
| O | -1.403471 | -2.556582 | 6.100098  |
| O | -3.585612 | 0.094551  | 1.925734  |
| O | 0.142693  | 5.320064  | 1.430819  |
| O | -0.441413 | 3.438062  | 3.489956  |
| O | -1.461963 | 2.524283  | 5.989673  |
| O | -4.725925 | 2.618930  | 1.442750  |
| O | -4.848615 | -2.006530 | 1.092401  |
| H | -4.956653 | -1.067521 | 1.417314  |
| H | -4.517228 | -1.837951 | 0.164575  |

The optimized geometry of  $^2\mathbf{1}(\text{Si})$  in ground state

|    |           |           |           |
|----|-----------|-----------|-----------|
| O  | -0.048677 | -0.041116 | -0.081187 |
| Si | -0.009219 | -0.012275 | 1.562289  |
| O  | 1.546075  | -0.004824 | 2.102921  |
| O  | -0.733295 | -1.395921 | 2.161894  |
| Ru | -2.720528 | -1.738758 | 1.675041  |
| O  | -2.720500 | -2.161996 | 3.656972  |
| W  | -1.063620 | -1.929614 | 4.480829  |
| O  | -1.465194 | -0.007745 | 4.669324  |
| W  | -1.094505 | 1.848549  | 4.397325  |
| O  | 0.775741  | 1.339622  | 4.594283  |
| W  | 2.169287  | 0.019169  | 4.404627  |
| O  | 0.802731  | -1.287416 | 4.643999  |
| O  | -0.817216 | 1.310503  | 2.110730  |



|   |           |           |           |
|---|-----------|-----------|-----------|
| O | 3.286062  | -1.311697 | 3.517795  |
| W | 3.148642  | -1.700120 | 1.608663  |
| O | 4.034818  | 0.025824  | 1.308152  |
| W | 3.148970  | 1.721947  | 1.602933  |
| O | 3.265262  | 1.377875  | 3.503340  |
| O | 1.741297  | -2.935727 | 1.967188  |
| W | -0.079490 | -3.657106 | 1.680201  |
| O | -1.916567 | -3.572870 | 1.367826  |
| O | 0.232905  | -5.368199 | 1.496040  |
| O | 0.224051  | -2.977940 | -0.148147 |
| W | 0.937440  | -1.731744 | -1.409146 |
| O | -0.800634 | -1.349004 | -2.174305 |
| W | -2.044402 | -0.001834 | -1.454483 |
| O | -2.673003 | 1.364284  | -0.219194 |
| W | -3.117221 | 1.881570  | 1.605516  |
| O | -2.798253 | 2.164280  | 3.526314  |
| O | -0.347561 | -3.525637 | 3.610345  |
| O | 4.522201  | -2.762380 | 1.411633  |
| O | 2.450653  | -1.605336 | -0.184788 |
| O | 1.568577  | -2.805725 | -2.633979 |
| O | 1.536805  | -0.014284 | -2.160930 |
| W | 0.962656  | 1.687629  | -1.452923 |
| O | -0.788370 | 1.343429  | -2.173691 |
| O | 1.593909  | 2.774285  | -2.665697 |
| O | 2.434884  | 1.623149  | -0.190752 |
| O | 0.169598  | 2.919758  | -0.182803 |
| W | -0.116282 | 3.581039  | 1.615670  |
| O | -2.015492 | 3.498634  | 1.322163  |
| O | -3.248676 | 0.033944  | -2.726112 |
| O | -2.757367 | -1.294299 | -0.297789 |
| O | 4.490320  | 2.821792  | 1.395250  |
| O | 1.686789  | 2.937723  | 1.941100  |
| O | 2.920451  | 0.051021  | 5.982174  |
| O | -1.380695 | -2.534382 | 6.091121  |
| O | -3.545058 | 0.088484  | 1.946975  |
| O | 0.158585  | 5.294596  | 1.420038  |
| O | -0.453641 | 3.485877  | 3.515555  |
| O | -1.447083 | 2.503918  | 5.977876  |
| O | -4.707538 | 2.595930  | 1.434942  |
| O | -4.918882 | -1.896933 | 1.000190  |
| H | -4.903881 | -0.964435 | 1.368193  |
| H | -4.464896 | -1.731929 | 0.121432  |

The optimized geometry of  $3\mathbf{1}^{\text{le}}$  oxidized in ground state

|    |           |           |           |
|----|-----------|-----------|-----------|
| O  | -0.079569 | -0.048990 | 0.006635  |
| P  | -0.030620 | 0.006943  | 1.549034  |
| O  | 1.421262  | -0.035340 | 2.070593  |
| O  | -0.770133 | -1.277956 | 2.134999  |
| Ru | -2.713178 | -1.736192 | 1.653460  |
| O  | -2.720403 | -2.151104 | 3.636993  |
| W  | -1.093636 | -1.908548 | 4.530134  |
| O  | -1.486366 | -0.001806 | 4.715744  |
| W  | -1.092470 | 1.857158  | 4.451842  |
| O  | 0.759682  | 1.328796  | 4.634586  |
| W  | 2.150436  | 0.002331  | 4.440015  |
| O  | 0.768933  | -1.293554 | 4.671092  |
| O  | -0.769414 | 1.263260  | 2.068998  |
| O  | 3.211555  | -1.319361 | 3.481396  |
| W  | 3.170912  | -1.729451 | 1.587917  |
| O  | 3.965406  | 0.012366  | 1.299469  |
| W  | 3.157484  | 1.749640  | 1.589319  |
| O  | 3.195826  | 1.340002  | 3.470751  |
| O  | 1.743847  | -2.995420 | 1.947544  |
| W  | -0.036778 | -3.664799 | 1.671715  |
| O  | -1.936663 | -3.478023 | 1.354050  |
| O  | 0.193801  | -5.367188 | 1.500400  |
| O  | 0.199890  | -2.985707 | -0.146774 |
| W  | 0.944565  | -1.761378 | -1.428414 |
| O  | -0.810643 | -1.339109 | -2.130851 |
| W  | -2.086331 | -0.009618 | -1.489436 |
| O  | -2.707514 | 1.322753  | -0.214926 |
| W  | -3.100271 | 1.895155  | 1.593373  |
| O  | -2.764710 | 2.115065  | 3.501650  |
| O  | -0.380765 | -3.460810 | 3.559385  |
| O  | 4.539356  | -2.766108 | 1.409954  |
| O  | 2.440503  | -1.661086 | -0.189604 |
| O  | 1.550475  | -2.818826 | -2.650686 |
| O  | 1.503115  | -0.020083 | -2.102795 |
| W  | 0.964167  | 1.720094  | -1.459451 |
| O  | -0.799570 | 1.323660  | -2.120864 |
| O  | 1.576622  | 2.769284  | -2.685345 |
| O  | 2.428293  | 1.651439  | -0.192342 |
| O  | 0.173255  | 2.949954  | -0.187790 |
| W  | -0.085101 | 3.616276  | 1.607589  |
| O  | -2.012710 | 3.458859  | 1.316845  |
| O  | -3.264800 | 0.039565  | -2.754404 |

|   |           |           |           |
|---|-----------|-----------|-----------|
| O | -2.830609 | -1.322494 | -0.338928 |
| O | 4.510167  | 2.805518  | 1.406962  |
| O | 1.703031  | 2.980156  | 1.929180  |
| O | 2.921048  | 0.021849  | 5.984661  |
| O | -1.429889 | -2.546304 | 6.100986  |
| O | -3.434783 | 0.027230  | 1.964107  |
| O | 0.145823  | 5.317599  | 1.431625  |
| O | -0.462517 | 3.443131  | 3.488644  |
| O | -1.457737 | 2.531640  | 5.997957  |
| O | -4.709690 | 2.516996  | 1.448801  |
| O | -4.739829 | -2.192688 | 1.005676  |
| H | -5.147819 | -1.372608 | 1.365932  |
| H | -4.382312 | -1.884005 | 0.103527  |

The optimized geometry of  ${}^3\mathbf{1}^{1e1H^+}$  oxidized in ground state

|    |           |           |           |
|----|-----------|-----------|-----------|
| O  | -0.047651 | -0.033600 | 0.008310  |
| P  | -0.019644 | -0.003224 | 1.560039  |
| O  | 1.446341  | -0.022677 | 2.074687  |
| O  | -0.763795 | -1.274555 | 2.116376  |
| Ru | -2.828211 | -1.775945 | 1.638643  |
| O  | -2.747076 | -2.157676 | 3.634404  |
| W  | -1.116519 | -1.899014 | 4.493607  |
| O  | -1.486149 | 0.012776  | 4.689032  |
| W  | -1.077277 | 1.873907  | 4.443498  |
| O  | 0.771891  | 1.336411  | 4.641765  |
| W  | 2.151473  | -0.002997 | 4.439431  |
| O  | 0.768565  | -1.281783 | 4.656473  |
| O  | -0.742836 | 1.273651  | 2.073726  |
| O  | 3.229733  | -1.319176 | 3.494055  |
| W  | 3.167265  | -1.732449 | 1.595832  |
| O  | 3.979259  | 0.010646  | 1.310084  |
| W  | 3.159597  | 1.747703  | 1.591703  |
| O  | 3.206617  | 1.342028  | 3.480219  |
| O  | 1.740526  | -2.964004 | 1.952421  |
| W  | -0.065060 | -3.645516 | 1.654579  |
| O  | -1.926154 | -3.500185 | 1.352099  |
| O  | 0.197045  | -5.352735 | 1.491610  |
| O  | 0.224058  | -2.982185 | -0.161786 |
| W  | 0.965130  | -1.746368 | -1.434255 |
| O  | -0.785850 | -1.333273 | -2.127855 |
| W  | -2.089882 | -0.022400 | -1.458254 |
| O  | -2.676251 | 1.357091  | -0.228046 |
| W  | -3.097961 | 1.870552  | 1.597965  |

|   |           |           |           |
|---|-----------|-----------|-----------|
| O | -2.744399 | 2.148646  | 3.506515  |
| O | -0.378555 | -3.451123 | 3.559576  |
| O | 4.538734  | -2.779931 | 1.422449  |
| O | 2.464045  | -1.653786 | -0.193113 |
| O | 1.576020  | -2.804657 | -2.664379 |
| O | 1.537660  | -0.012752 | -2.107096 |
| W | 0.968743  | 1.726352  | -1.464600 |
| O | -0.769344 | 1.328652  | -2.121083 |
| O | 1.594829  | 2.776011  | -2.695058 |
| O | 2.445917  | 1.648546  | -0.189845 |
| O | 0.208075  | 2.974435  | -0.195276 |
| W | -0.083413 | 3.624865  | 1.603499  |
| O | -1.976397 | 3.468832  | 1.318593  |
| O | -3.246458 | 0.041452  | -2.755190 |
| O | -2.826230 | -1.293710 | -0.328461 |
| O | 4.522088  | 2.805591  | 1.412508  |
| O | 1.716040  | 2.979043  | 1.933411  |
| O | 2.920442  | 0.011950  | 5.994322  |
| O | -1.432417 | -2.525582 | 6.081773  |
| O | -3.436014 | 0.063839  | 1.940567  |
| O | 0.160661  | 5.333487  | 1.434428  |
| O | -0.430523 | 3.459750  | 3.498948  |
| O | -1.442535 | 2.541246  | 6.001330  |
| O | -4.688409 | 2.552597  | 1.445775  |
| O | -4.625718 | -2.469269 | 1.322972  |
| H | -4.749417 | -2.228252 | 0.376569  |

The optimized geometry of  $3\mathbf{1}^{1e2H+}$  oxidized in ground state

|    |           |           |           |
|----|-----------|-----------|-----------|
| O  | -0.049852 | -0.091087 | 0.006226  |
| P  | -0.020142 | -0.025216 | 1.563498  |
| O  | 1.458287  | -0.061531 | 2.056745  |
| O  | -0.792861 | -1.246302 | 2.149456  |
| O  | -0.691667 | 1.308473  | 2.038167  |
| Ru | 0.005051  | 3.435773  | 1.495615  |
| O  | 0.293259  | 5.184016  | 1.259386  |
| O  | -0.368037 | 3.500543  | 3.507912  |
| W  | -0.993584 | 2.025691  | 4.411441  |
| O  | -1.337531 | 2.679675  | 5.992346  |
| O  | -2.027623 | 3.468492  | 1.251067  |
| W  | -3.056421 | 1.985673  | 1.605466  |
| O  | -2.730831 | 2.133700  | 3.525898  |
| O  | 0.344924  | 2.882903  | -0.428816 |
| W  | 1.010080  | 1.582885  | -1.516443 |

|   |           |           |           |
|---|-----------|-----------|-----------|
| O | 1.658710  | 2.481321  | -2.866887 |
| O | 1.950505  | 2.913616  | 1.753809  |
| W | 3.204419  | 1.625235  | 1.465246  |
| O | 4.674296  | 2.539458  | 1.230156  |
| O | 0.832012  | 1.318088  | 4.618473  |
| W | 2.197850  | -0.006505 | 4.400257  |
| O | 2.989603  | 0.016899  | 5.952305  |
| O | -1.455728 | 0.091123  | 4.689167  |
| W | -1.099979 | -1.757625 | 4.547974  |
| O | -1.468497 | -2.358287 | 6.143432  |
| O | 0.765823  | -1.298556 | 4.693577  |
| O | 3.303050  | 1.202469  | 3.396439  |
| O | 3.166432  | -1.460456 | 3.513947  |
| W | 3.110485  | -1.896175 | 1.627106  |
| O | 4.424459  | -3.034326 | 1.492056  |
| O | -2.808964 | -2.017755 | 3.644244  |
| W | -3.167130 | -1.797444 | 1.740208  |
| O | -2.756135 | -1.367757 | -0.093241 |
| W | -2.067228 | -0.091871 | -1.397796 |
| O | -0.912393 | -1.540688 | -2.031530 |
| W | 0.879090  | -1.939481 | -1.408551 |
| O | 2.360814  | -1.908625 | -0.160692 |
| O | -0.542317 | -3.410500 | 3.646881  |
| W | -0.209833 | -3.661879 | 1.754403  |
| O | 1.595551  | -3.069880 | 2.039156  |
| O | -2.118328 | -3.441215 | 1.505551  |
| O | -3.433399 | 0.052937  | 2.001714  |
| O | -4.791707 | -2.422390 | 1.629173  |
| O | 0.048869  | -3.100332 | -0.064044 |
| O | -0.039628 | -5.394336 | 1.653710  |
| O | -4.676589 | 2.615119  | 1.450144  |
| O | -2.700138 | 1.248587  | -0.184113 |
| O | -0.797465 | 1.122108  | -2.176741 |
| O | -3.313586 | -0.109317 | -2.615383 |
| O | 2.544978  | 1.340434  | -0.343725 |
| O | 1.453335  | -0.299957 | -2.148843 |
| O | 3.965750  | -0.251457 | 1.266566  |
| O | 1.415773  | -3.092303 | -2.601525 |

The optimized geometry of  $4\mathbf{1}^{2e2H+}$  oxidized in ground state

|   |           |           |          |
|---|-----------|-----------|----------|
| O | -0.044826 | -0.091990 | 0.004543 |
| P | -0.013396 | -0.032575 | 1.558678 |
| O | 1.461542  | -0.062444 | 2.052302 |

|    |           |           |           |
|----|-----------|-----------|-----------|
| O  | -0.788324 | -1.247869 | 2.146274  |
| O  | -0.693501 | 1.296174  | 2.039797  |
| Ru | -0.005616 | 3.393910  | 1.503972  |
| O  | 0.296356  | 5.138912  | 1.258159  |
| O  | -0.342923 | 3.505160  | 3.465244  |
| W  | -0.985533 | 2.003609  | 4.408771  |
| O  | -1.317971 | 2.684175  | 5.969761  |
| O  | -1.979517 | 3.473262  | 1.239617  |
| W  | -3.051215 | 1.963322  | 1.599364  |
| O  | -2.696213 | 2.200992  | 3.499531  |
| O  | 0.307046  | 2.870685  | -0.399469 |
| W  | 1.001822  | 1.566991  | -1.526101 |
| O  | 1.639880  | 2.490370  | -2.851530 |
| O  | 1.911307  | 2.901299  | 1.781335  |
| W  | 3.211545  | 1.609654  | 1.476625  |
| O  | 4.654000  | 2.548382  | 1.242872  |
| O  | 0.838396  | 1.341940  | 4.602359  |
| W  | 2.202779  | -0.002368 | 4.402410  |
| O  | 2.982550  | 0.025992  | 5.950267  |
| O  | -1.458582 | 0.117184  | 4.678831  |
| W  | -1.100574 | -1.755169 | 4.541657  |
| O  | -1.467108 | -2.338251 | 6.133254  |
| O  | 0.758124  | -1.268000 | 4.692076  |
| O  | 3.298356  | 1.225895  | 3.399654  |
| O  | 3.173121  | -1.435461 | 3.513130  |
| W  | 3.099321  | -1.886959 | 1.627459  |
| O  | 4.411862  | -3.011521 | 1.489011  |
| O  | -2.809360 | -1.992291 | 3.644199  |
| W  | -3.160939 | -1.795201 | 1.741765  |
| O  | -2.757540 | -1.337598 | -0.086377 |
| W  | -2.068117 | -0.087271 | -1.403523 |
| O  | -0.910206 | -1.516067 | -2.038125 |
| W  | 0.874400  | -1.930319 | -1.397946 |
| O  | 2.358734  | -1.886060 | -0.159290 |
| O  | -0.545405 | -3.397809 | 3.651273  |
| W  | -0.211918 | -3.648613 | 1.756487  |
| O  | 1.595505  | -3.055460 | 2.039840  |
| O  | -2.123292 | -3.428606 | 1.507296  |
| O  | -3.424251 | 0.079099  | 2.006914  |
| O  | -4.781688 | -2.402148 | 1.630480  |
| O  | 0.048242  | -3.085810 | -0.064055 |
| O  | -0.040970 | -5.371209 | 1.654529  |
| O  | -4.649098 | 2.619930  | 1.437872  |
| O  | -2.683486 | 1.272355  | -0.186073 |

|   |           |           |           |
|---|-----------|-----------|-----------|
| O | -0.802604 | 1.145342  | -2.173881 |
| O | -3.314055 | -0.100594 | -2.608593 |
| O | 2.512320  | 1.414856  | -0.320794 |
| O | 1.453493  | -0.271875 | -2.142047 |
| O | 3.959528  | -0.223520 | 1.263771  |
| O | 1.414681  | -3.068993 | -2.588788 |

The optimized geometry of  $^3\mathbf{1}^{3e2H+}$  oxidized in ground state

|    |           |           |           |
|----|-----------|-----------|-----------|
| O  | -0.049165 | -0.069050 | 0.001464  |
| P  | -0.008963 | -0.024557 | 1.553476  |
| O  | 1.467917  | -0.077656 | 2.043256  |
| O  | -0.788676 | -1.233807 | 2.137882  |
| O  | -0.673554 | 1.309080  | 2.039854  |
| Ru | 0.019775  | 3.471466  | 1.493839  |
| O  | 0.321960  | 5.166779  | 1.272000  |
| O  | -0.343868 | 3.552551  | 3.455929  |
| W  | -0.959458 | 2.029717  | 4.402636  |
| O  | -1.297348 | 2.710880  | 5.952903  |
| O  | -1.870754 | 3.421796  | 1.228052  |
| W  | -3.039848 | 1.898248  | 1.612733  |
| O  | -2.672308 | 2.219586  | 3.482921  |
| O  | 0.299755  | 2.942848  | -0.410488 |
| W  | 0.964402  | 1.598348  | -1.538229 |
| O  | 1.616394  | 2.515069  | -2.849895 |
| O  | 1.735453  | 2.798646  | 1.846523  |
| W  | 3.204520  | 1.524605  | 1.472453  |
| O  | 4.548671  | 2.586388  | 1.250548  |
| O  | 0.847255  | 1.364047  | 4.603757  |
| W  | 2.197710  | -0.000084 | 4.415012  |
| O  | 2.978533  | 0.034011  | 5.953119  |
| O  | -1.449691 | 0.143603  | 4.661344  |
| W  | -1.109291 | -1.729132 | 4.531155  |
| O  | -1.476454 | -2.302864 | 6.116772  |
| O  | 0.763765  | -1.253218 | 4.686762  |
| O  | 3.272712  | 1.251912  | 3.394206  |
| O  | 3.197047  | -1.404962 | 3.503734  |
| W  | 3.092708  | -1.914666 | 1.642024  |
| O  | 4.411311  | -3.017154 | 1.494395  |
| O  | -2.813130 | -1.981468 | 3.629470  |
| W  | -3.164914 | -1.828538 | 1.732130  |
| O  | -2.766461 | -1.327690 | -0.080976 |
| W  | -2.069279 | -0.094053 | -1.408406 |
| O  | -0.899211 | -1.501409 | -2.034953 |

|   |           |           |           |
|---|-----------|-----------|-----------|
| W | 0.889754  | -1.897548 | -1.388336 |
| O | 2.377129  | -1.852241 | -0.142833 |
| O | -0.542505 | -3.374026 | 3.640948  |
| W | -0.209729 | -3.642394 | 1.758722  |
| O | 1.622605  | -3.070666 | 2.051388  |
| O | -2.123298 | -3.435529 | 1.496588  |
| O | -3.458733 | 0.078170  | 2.009562  |
| O | -4.776532 | -2.433630 | 1.618005  |
| O | 0.072862  | -3.054664 | -0.048707 |
| O | -0.039487 | -5.355743 | 1.652136  |
| O | -4.589409 | 2.638740  | 1.431728  |
| O | -2.669268 | 1.271528  | -0.180072 |
| O | -0.818124 | 1.169072  | -2.175806 |
| O | -3.313777 | -0.105835 | -2.603445 |
| O | 2.461658  | 1.451377  | -0.293615 |
| O | 1.455067  | -0.228483 | -2.126737 |
| O | 3.988925  | -0.200536 | 1.258854  |
| O | 1.438961  | -3.025111 | -2.573437 |
